# Supplementary material for: Tungstic acids H2WO4 and H4WO5 as stable photocatalysts for water oxidation under visible light
Source: Royal Society of Chemistry journal article supplement (doi:10.1039/c7ta01228d), 2017-01-01
Supplement: c7ta01228d1.pdf [file c7ta01228d1.pdf]

## ***Supporting Information***

### **Tungstic acids $\text{H}_2\text{WO}_4$ and $\text{H}_4\text{WO}_5$ as stable photocatalysts for water oxidation under visible light**

Hajime Suzuki,<sup>a</sup> Osamu Tomita,<sup>a</sup> Masanobu Higashi<sup>a</sup> and Ryu Abe<sup>\* a, b</sup>

<sup>a</sup> *Department of Energy and Hydrocarbon Chemistry, Graduate School of Engineering, Kyoto University, Katsura, Nishikyo-ku, Kyoto 615-8510, Japan*

<sup>b</sup> *JST-CREST, Gobancho 7, Chiyoda-ku, Tokyo 102-0075, Japan*

*\*E-mail: ryu-abe@scl.kyoto-u.ac.jp*

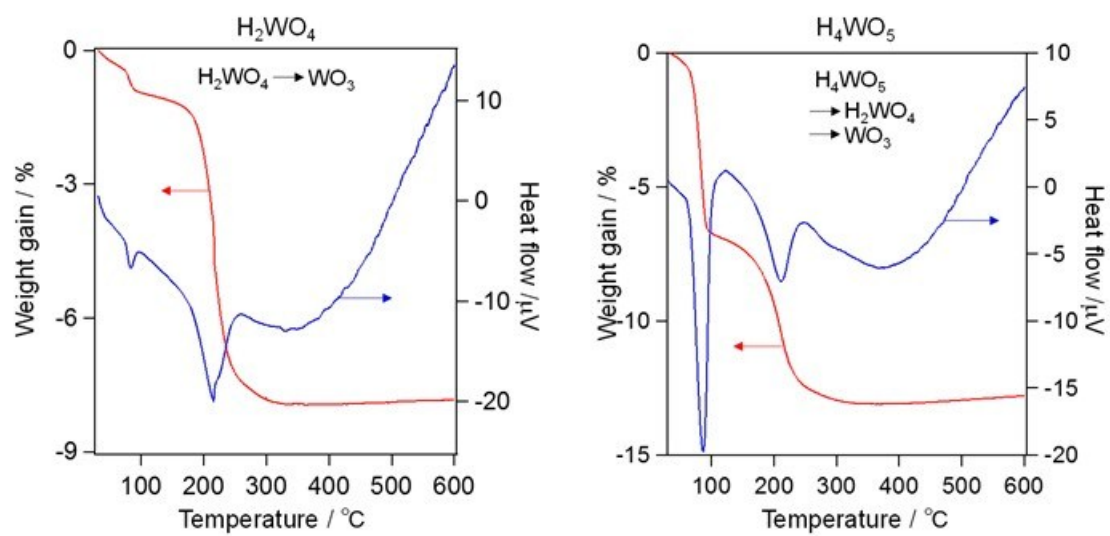

Fig. S1. TG-DTA profiles of  $\text{H}_2\text{WO}_4$ -W and  $\text{H}_4\text{WO}_5$ .

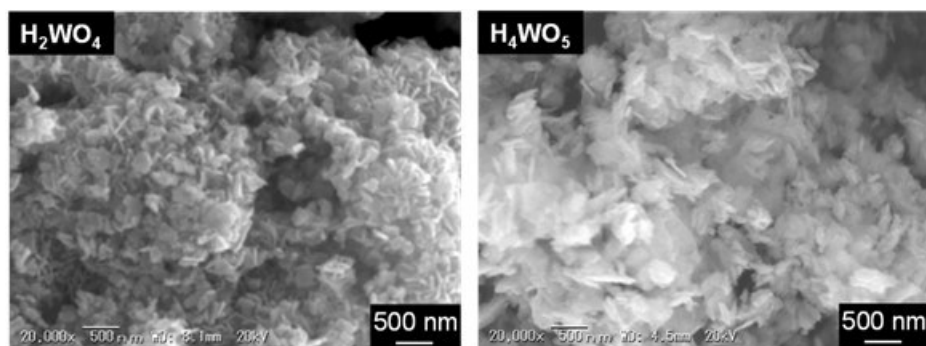

Fig. S2. SEM images of  $\text{H}_2\text{WO}_4$ -W and  $\text{H}_4\text{WO}_5$ .

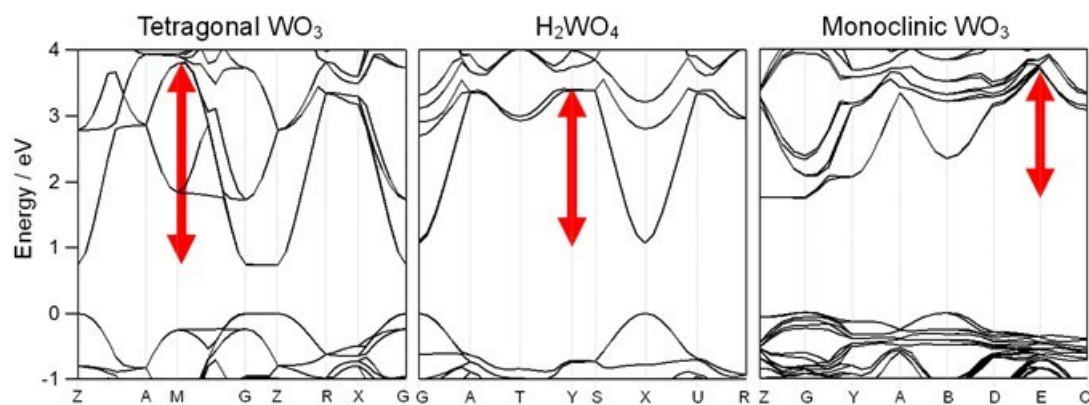

Fig. S3 Band structures of  $\text{H}_2\text{WO}_4$ ,  $t\text{-WO}_3$ , and  $m\text{-WO}_3$ . The energy was calculated using the generalized gradient approximation (GGA) of DFT proposed by Perdew, Burke, and Ernzerhof (PBE). The electronic states were expanded using a plane wave basis set with a cutoff of 340 eV. Geometry optimization calculation was performed before electronic structure calculation using the Broyden–Fletcher–Goldfarb–Shanno (BFGS) algorithm.

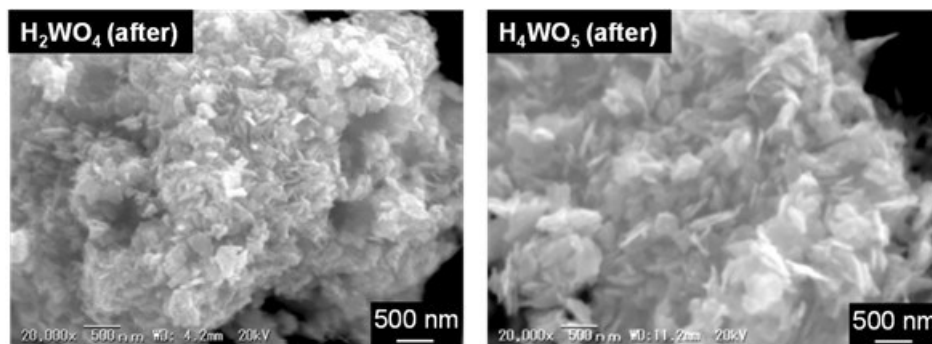

Fig. S4. SEM images of  $\text{H}_2\text{WO}_4\text{-W}$  and  $\text{H}_4\text{WO}_5$  after  $\text{O}_2$  evolution from aqueous  $\text{Fe}(\text{ClO}_4)_3$  solution under visible light ( $\lambda > 400 \text{ nm}$ ).

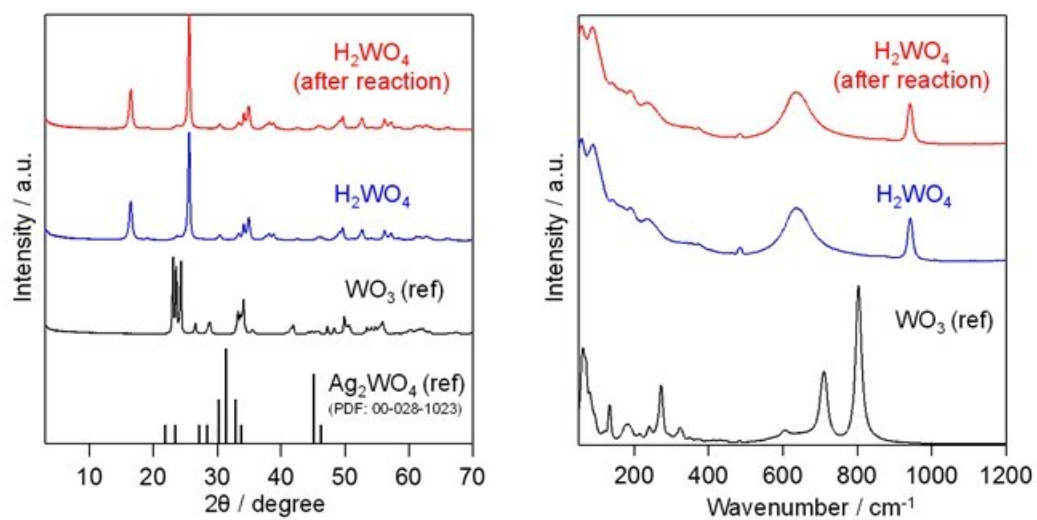

Fig. S5. XRD patterns and Raman spectra of H<sub>2</sub>WO<sub>4</sub>-W before and after visible light irradiation ( $\lambda > 400$  nm) in AgNO<sub>3</sub> aqueous solution.

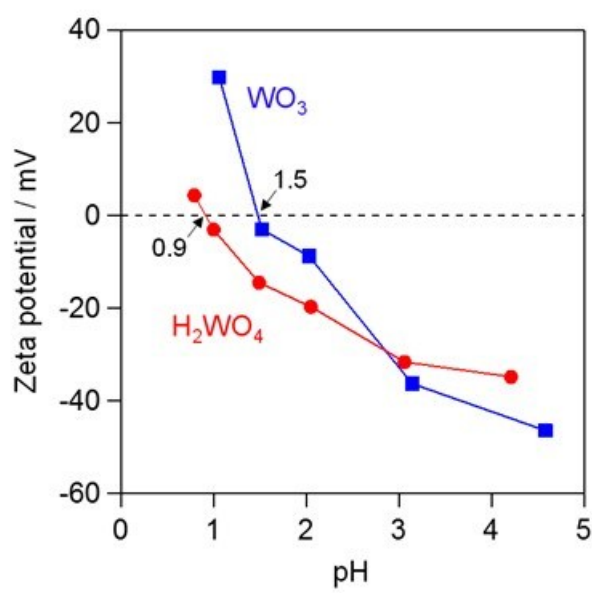

Fig. S6. Zeta potentials of H<sub>2</sub>WO<sub>4</sub>-W and *m*-WO<sub>3</sub>. (pH was adjusted by HCl(aq.))

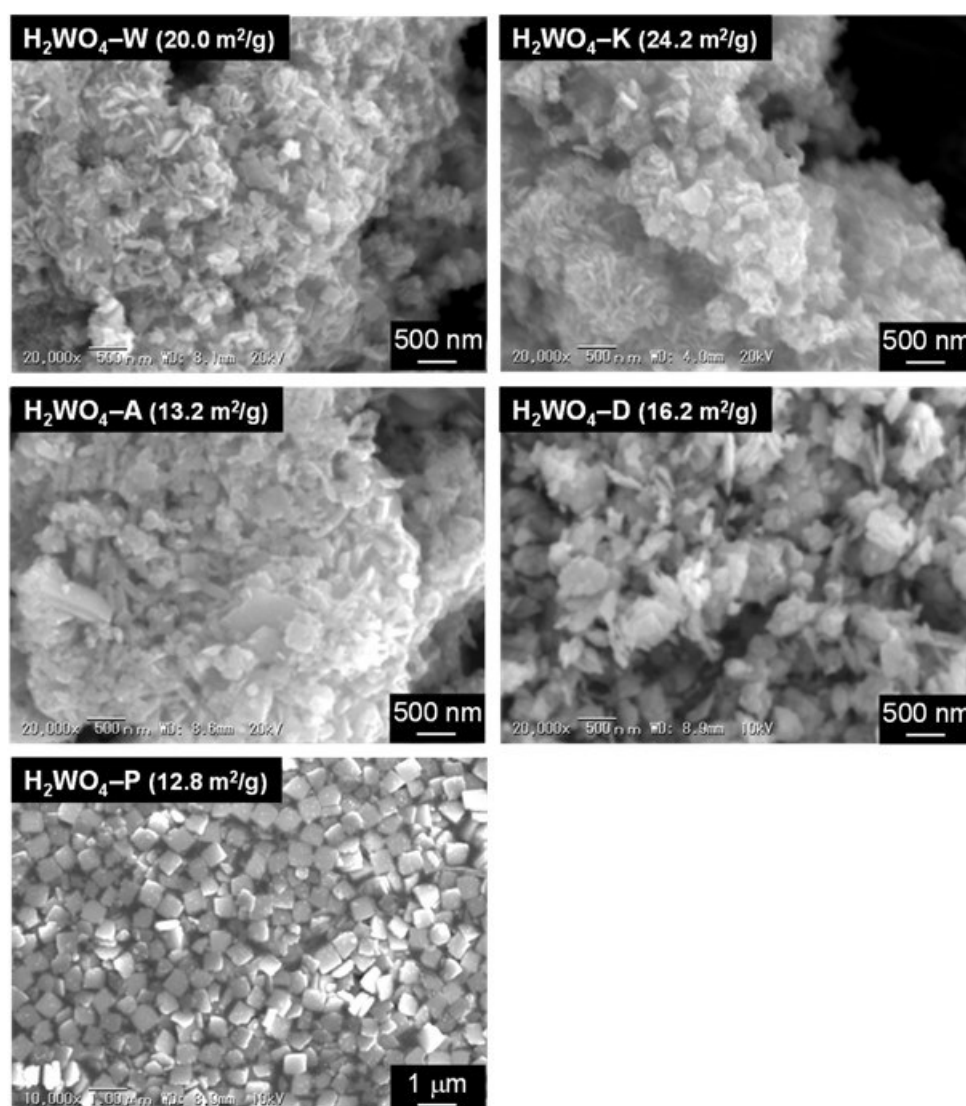

Fig. S7. SEM images of various  $\text{H}_2\text{WO}_4$  samples.

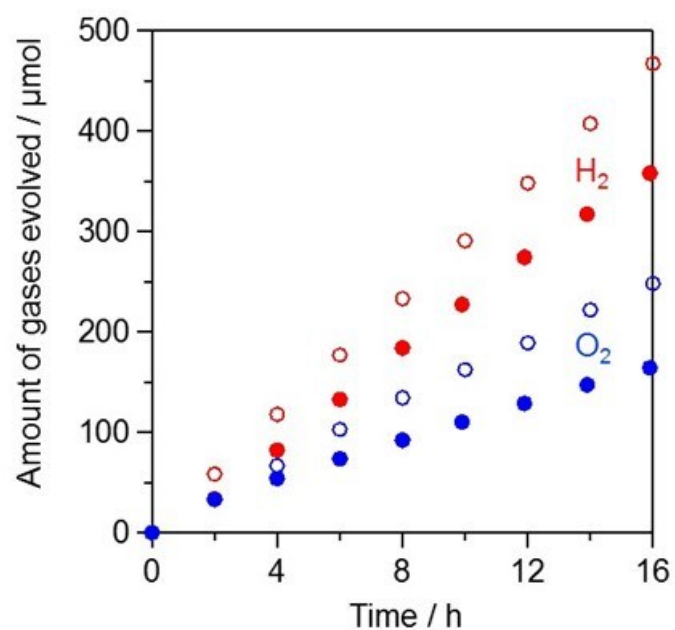

Fig. S8. Time courses of H<sub>2</sub> and O<sub>2</sub> evolution using a mixture of Ru/SrTiO<sub>3</sub>:Rh and H<sub>2</sub>WO<sub>4</sub> (closed circles) and a mixture of Ru/SrTiO<sub>3</sub>:Rh and WO<sub>3</sub> (open circles) in Fe(ClO<sub>4</sub>)<sub>3</sub> aqueous solution (5 mM, pH 2.3) under visible light irradiation ( $\lambda > 400$  nm, Xe lamp).
